# Supplementary material for: Assessment of Treatment Response in Patients With Severe Asthma Using Visual and Quantitative Analysis of Chest CT
Source: PubMed Central journal article supplement — Korean J Radiol. 2024 Jun 20;25(7):673–83. doi: 10.3348/kjr.2024.0110 (PMC11214920; doi:10.3348/kjr.2024.0110), 2024-06-20
Supplement: kjr-25-673-s001.pdf [file kjr-25-673-s001.pdf]

## SUPPLEMENTS

**Supplementary Table 1.** Modified Bhalla scoring system

| HRCT findings                        | Score  |                                                |                                         |                                         |
|--------------------------------------|--------|------------------------------------------------|-----------------------------------------|-----------------------------------------|
|                                      | 0      | 1                                              | 2                                       | 3                                       |
| Severity of bronchiectasis           | Absent | Lumen slightly greater than adjacent vessel    | Lumen 2–3 x adjacent vessel             | Lumen > 3 x adjacent vessel             |
| Peri-bronchial thickening            | Absent | Airway wall thickness equal to adjacent vessel | Airway thickening ≤ 2 x adjacent vessel | Airway thickening > 2 x adjacent vessel |
| Extent of bronchiectasis*            | Absent | 1–5                                            | 6–9                                     | > 9                                     |
| Extent of mucus plugging*            | Absent | 1–5                                            | 6–9                                     | > 9                                     |
| Sacculation/abscesses*               | Absent | 1–5                                            | 6–9                                     | > 9                                     |
| Generation of bronchial divisions, n | Absent | Up to 4th generation                           | Up to 5th generation                    | Up to 6th generation                    |
| Bullae, n                            | Absent |                                                |                                         |                                         |
| Emphysema*                           | Absent | 1–5                                            | > 5                                     |                                         |
| Collapse/consolidation               | Absent | Subsegmental                                   | Segmental/lobar                         |                                         |
| Mosaic perfusion*                    | Absent | 1–5                                            | > 5                                     |                                         |

\*Number of bronchopulmonary segments affected.

HRCT = high resolution computed tomography

**Supplementary Table 2.** Correlations between visual and CT quantitative analysis on initial chest CT

| Visual assessment                 | Quantitative analysis: air trapping |                                |                              |                                | Quantitative analysis: airway |                   |                   |
|-----------------------------------|-------------------------------------|--------------------------------|------------------------------|--------------------------------|-------------------------------|-------------------|-------------------|
|                                   | Normal lung area                    | Air trapping without emphysema | Air trapping with emphysema* | Emphysema without air trapping | Total branch count            | Pi10              | Wall area         |
| Bronchiectasis scores, R1*        | -0.581<br>( $< 0.001$ )             | 0.582<br>( $< 0.001$ )         | 0.636<br>( $< 0.001$ )       | 0.186<br>(0.291)               | -0.230<br>(0.191)             | -0.108<br>(0.544) | -0.039<br>(0.828) |
| Bronchiectasis scores, R2*        | -0.516<br>(0.002)                   | 0.500<br>(0.003)               | 0.563<br>(0.001)             | 0.221<br>(0.231)               | -0.174<br>(0.325)             | 0.080<br>(0.653)  | 0.099<br>(0.577)  |
| Mucus plugging extent scores, R1* | -0.683<br>( $< 0.001$ )             | 0.664<br>( $< 0.001$ )         | 0.672<br>( $< 0.001$ )       | 0.223<br>(0.204)               | -0.537<br>(0.001)             | 0.095<br>(0.592)  | 0.131<br>(0.462)  |
| Mucus plugging extent scores, R2* | -0.672<br>( $< 0.001$ )             | 0.685<br>( $< 0.001$ )         | 0.652<br>( $< 0.001$ )       | 0.159<br>(0.370)               | -0.587<br>( $< 0.001$ )       | 0.215<br>(0.223)  | 0.239<br>(0.174)  |

Numbers in parentheses are *P* values.

\*Data are presented as correlation coefficients determined using the Spearman's correlation with corresponding *P* value in parentheses.

R1 = reader 1, R2 = reader 2

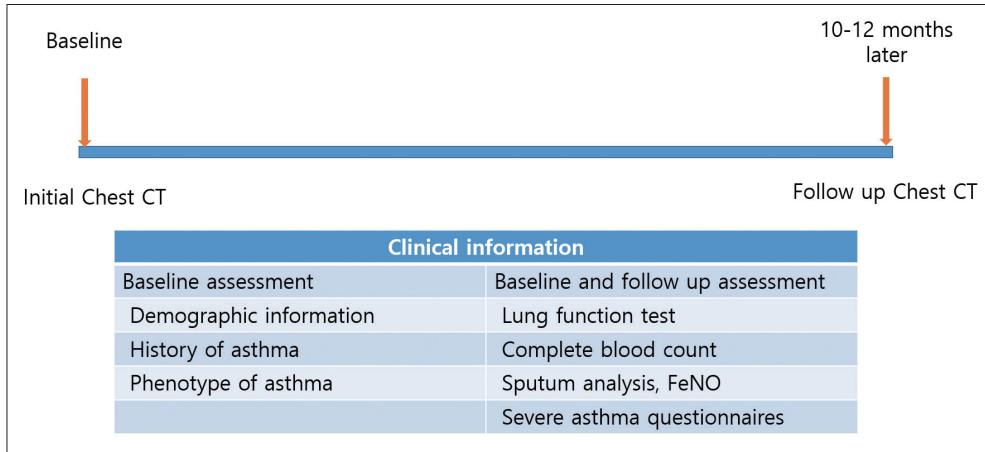

**Supplementary Fig. 1.** Study design of precision medicine intervention for severe asthma. The participants underwent chest CT scans at baseline and follow-up 10–12 months later, and the following clinical information was collected. FeNO = fractional exhaled nitric oxide

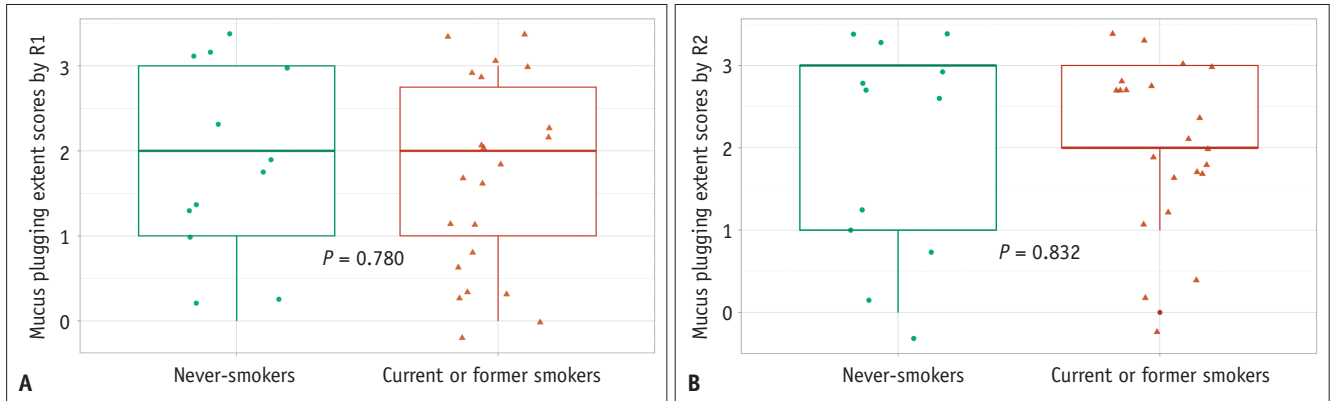

**Supplementary Fig. 2.** Distribution of mucus plugging extent scores by smoking habit. **A, B:** Distribution of mucus plugging extent scores by R1 (**A**) and R2 (**B**) according to never-smoker (green) and ever-smoker (orange) status. The box plots display the minimum, first-quartile, median, third-quartile, and maximum values. R1 = reader 1, R2 = reader 2

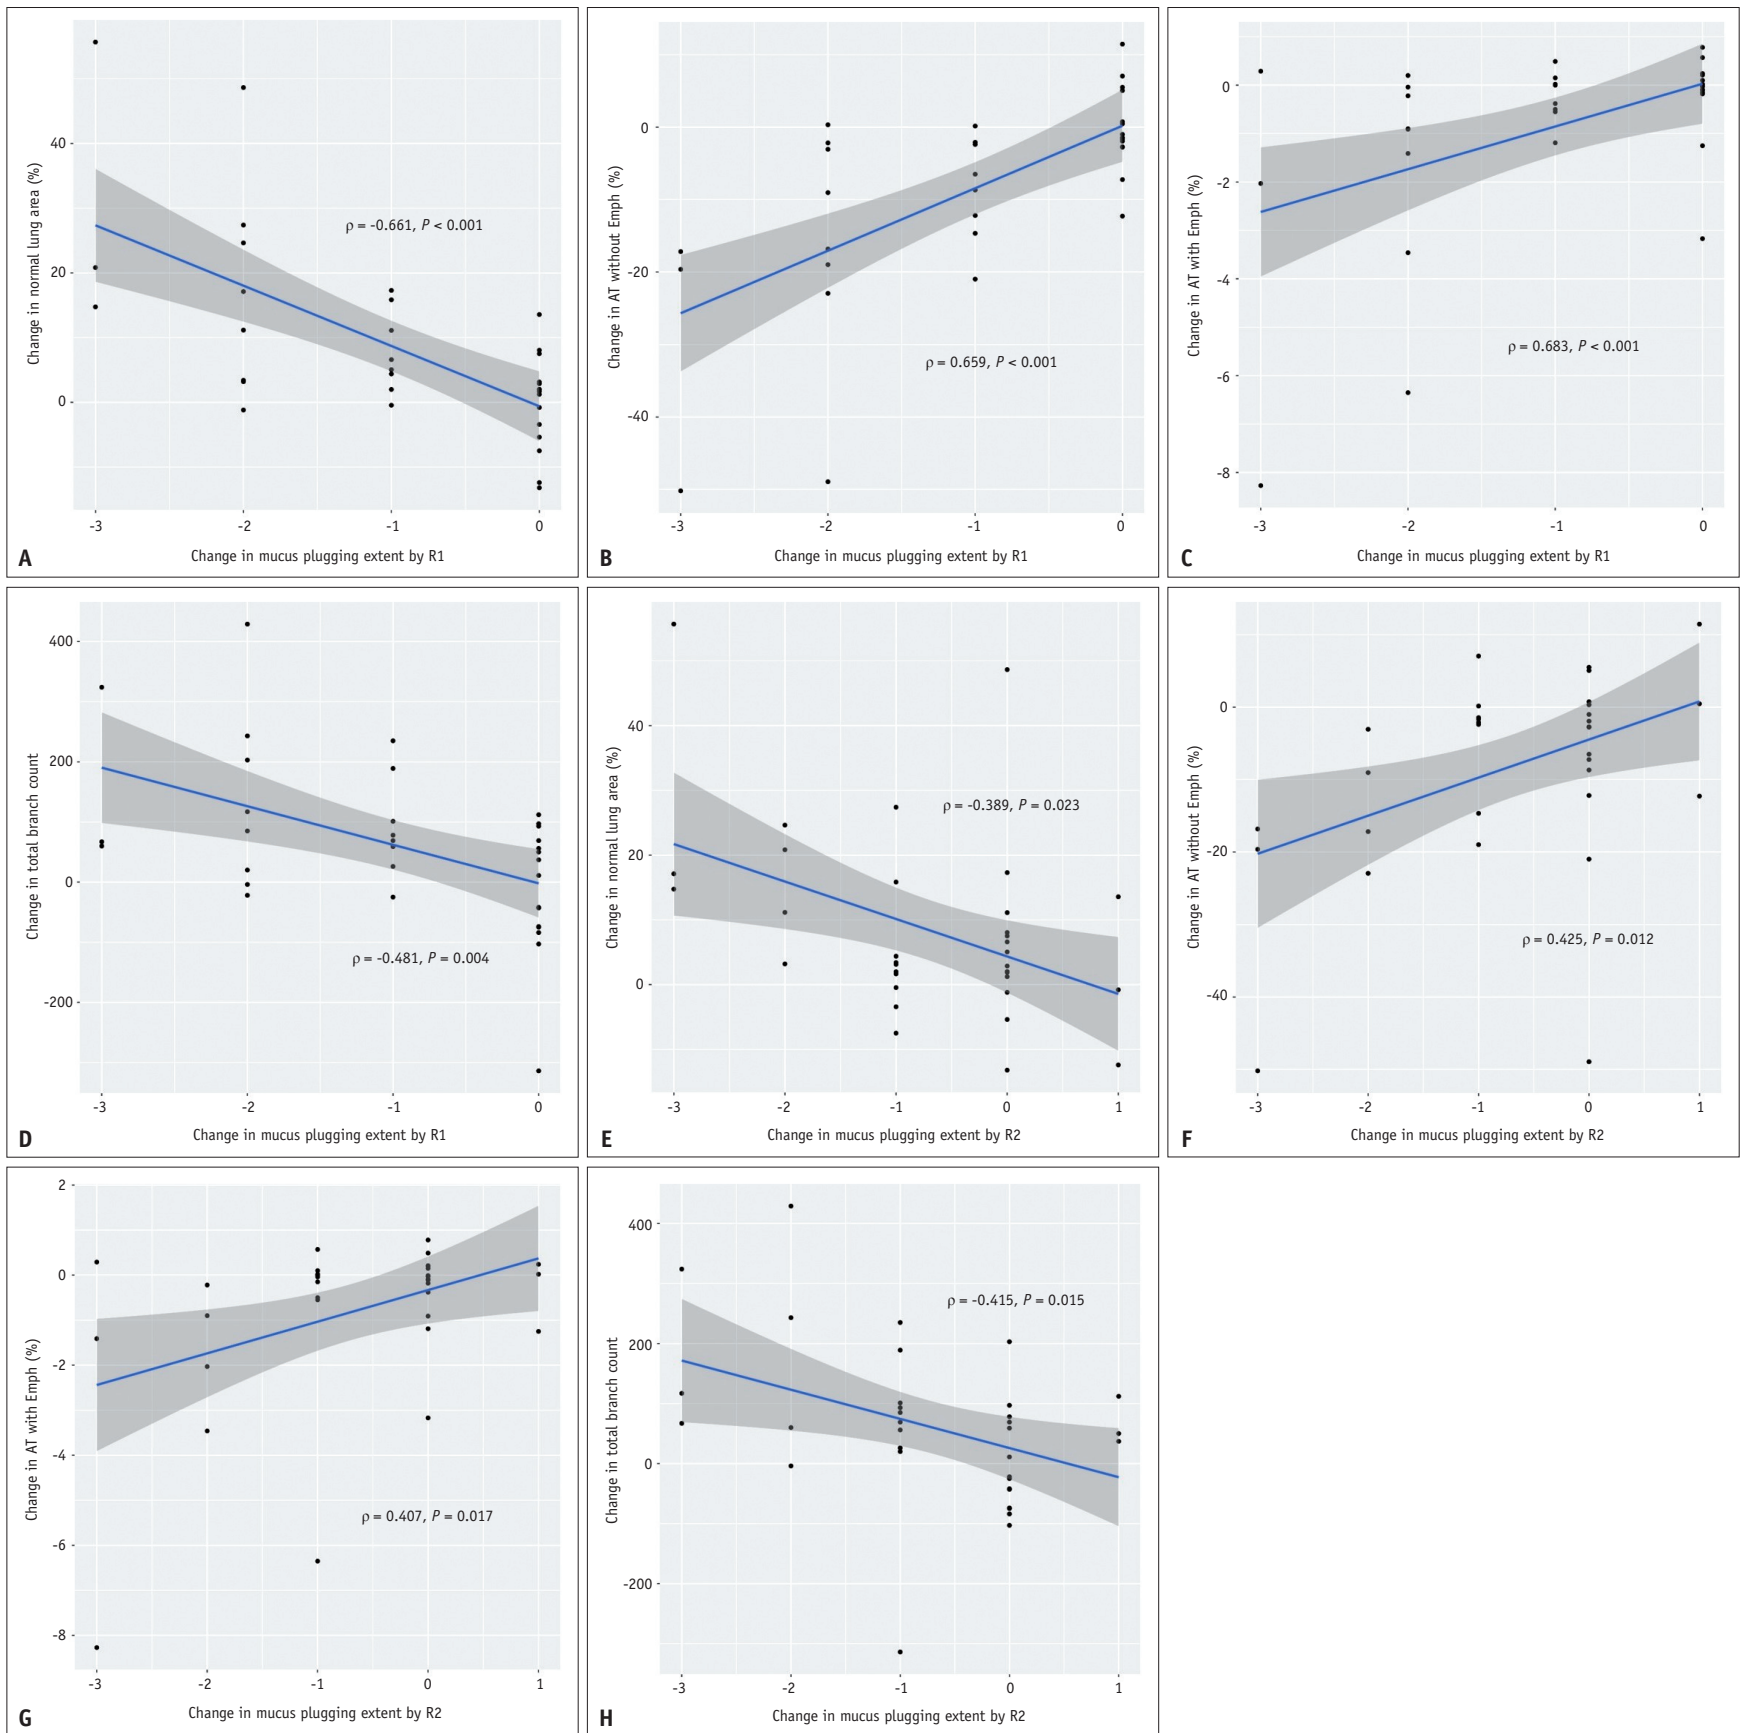

**Supplementary Fig. 3.** Scatterplots depicting the correlations between changes in mucus plugging extent and changes in quantitative CT measures. **A-H:** Linear correlations between changes in mucus plugging extent by R1 and normal lung area (%) ( $\rho = -0.661, P < 0.001$ ) (**A**), AT without emph (%) ( $\rho = 0.659, P < 0.001$ ) (**B**), AT with emph (%) ( $\rho = 0.683, P < 0.001$ ) (**C**) and total branch count ( $\rho = -0.481, P = 0.004$ ) (**D**) are presented. Linear correlations between changes in mucus plugging extent by R2 and normal lung area (%) ( $\rho = -0.389, P = 0.023$ ) (**E**), AT without emph (%) ( $\rho = 0.425, P = 0.012$ ) (**F**), AT with emph (%) ( $\rho = 0.407, P = 0.017$ ) (**G**) and total branch count ( $\rho = -0.415, P = 0.015$ ) (**H**) are shown. The blue lines represent the regression lines, while the gray areas represent 95% confidence intervals. R1 = reader 1, AT without emph = air trapping without emphysema, AT with emph = air trapping with emphysema, R2 = reader 2
